# Supplementary material for: Well-dispersed nickel nanoparticles on the external and internal surfaces of SBA-15 for hydrocracking of pyrolyzed α-cellulose
Source: Royal Society of Chemistry journal article supplement (doi:10.1039/c8ra09034c), 2019-01-01
Supplement: c8ra09034c1.pdf [file c8ra09034c1.pdf]

## Well-dispersed nickel nanoparticles on the external and internal surface of SBA-15 for hydrocracking of pyrolyzed $\alpha$ -cellulose

Wega Trisunaryanti,<sup>\*a</sup> Endah Suarsih<sup>a</sup>, Triyono<sup>a</sup> and Iip Izul Falah<sup>a</sup>

*Department of Chemistry, Universitas Gadjah Mada  
Bulaksumur, DI Yogyakarta 55281*

### Electronic Supplementary Information

#### Table of Contents

|                                                                      |    |
|----------------------------------------------------------------------|----|
| ESI 1 Original XRD patterns .....                                    | 1  |
| ESI 2 Catalyst characterization using SEM-EDX .....                  | 4  |
| ESI 3 Catalysts characterization using Gas Adsorption Analyzer ..... | 9  |
| ESI 4 Characterization of liquid product using GC-MS .....           | 14 |
| ESI 5 Catalysts characterization using TEM .....                     | 22 |

#### ESI 1 Original XRD patterns

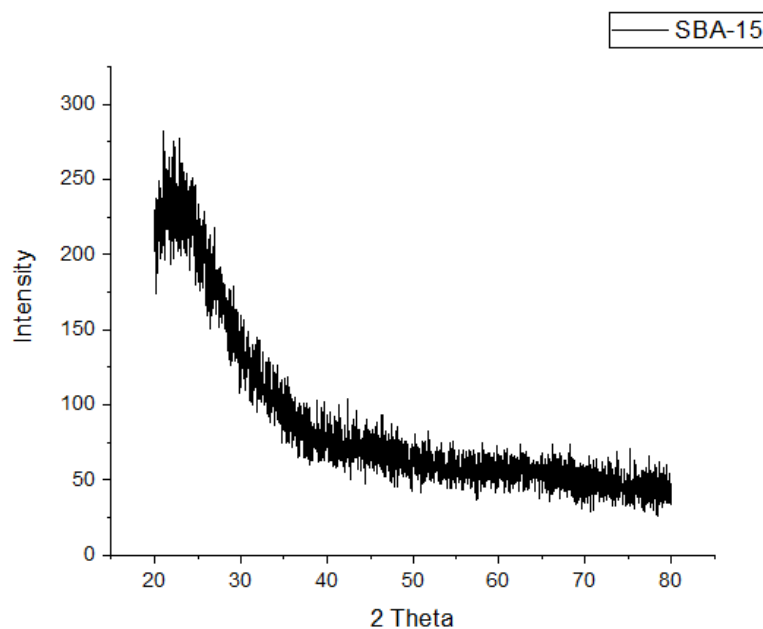

*Figure 1 Wide angle XRD pattern of SBA-15*

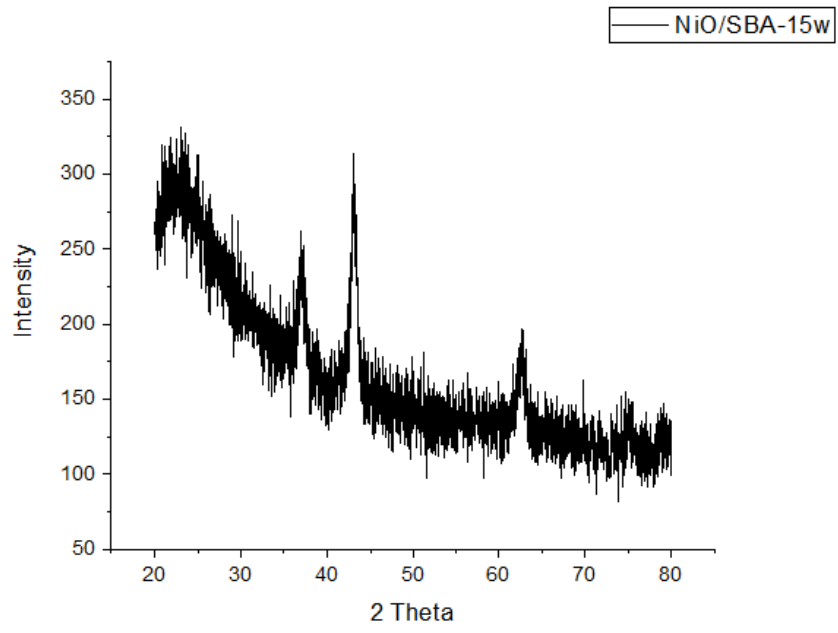

*Figure 2 Wide angle XRD pattern of NiO/SBA-15w*

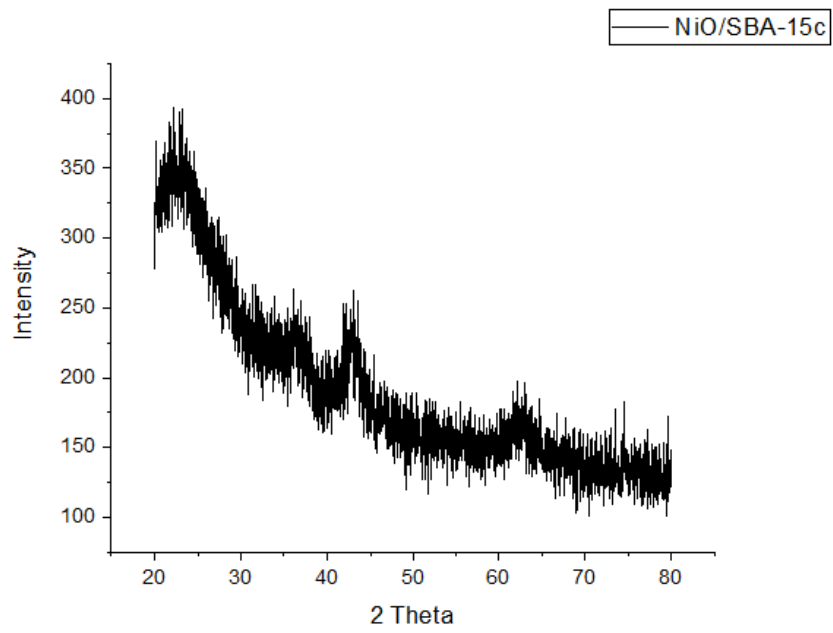

*Figure 3 Wide angle XRD pattern of NiO/SBA-15c*

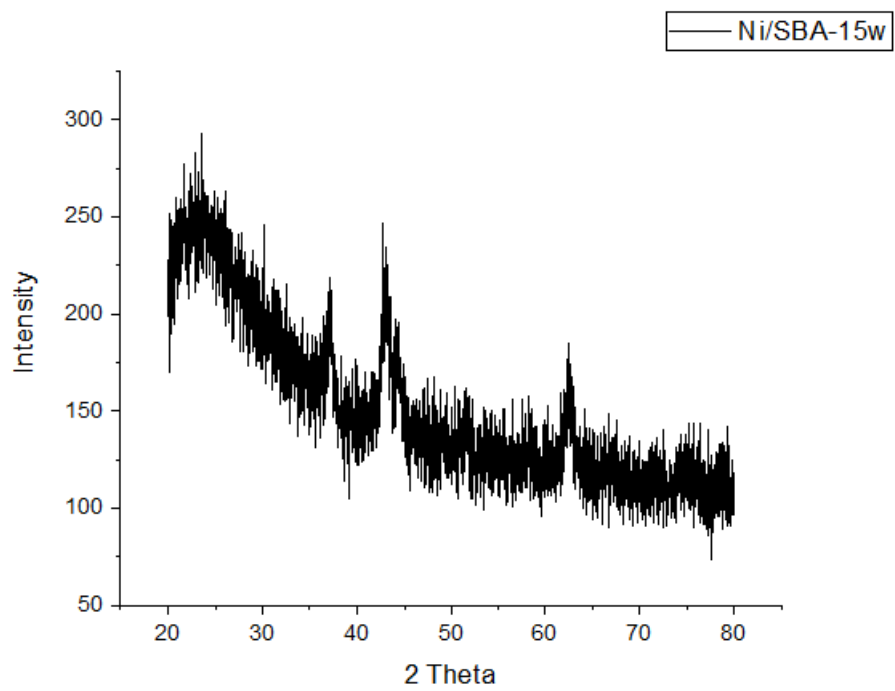

Figure 4 Wide angle XRD pattern of Ni/SBA-15w

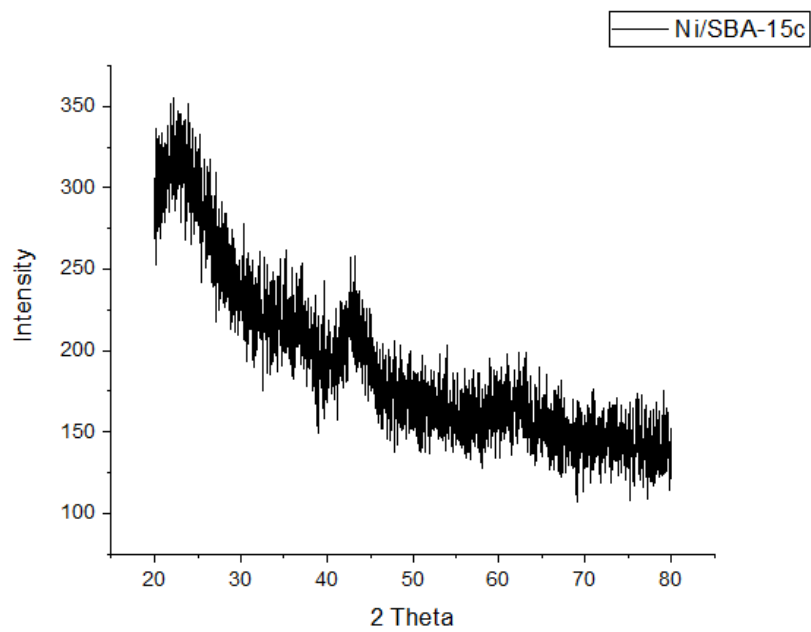

Figure 5 Wide angle XRD pattern of Ni/SBA-15c

# ESI 2 Catalyst characterization using SEM-EDX

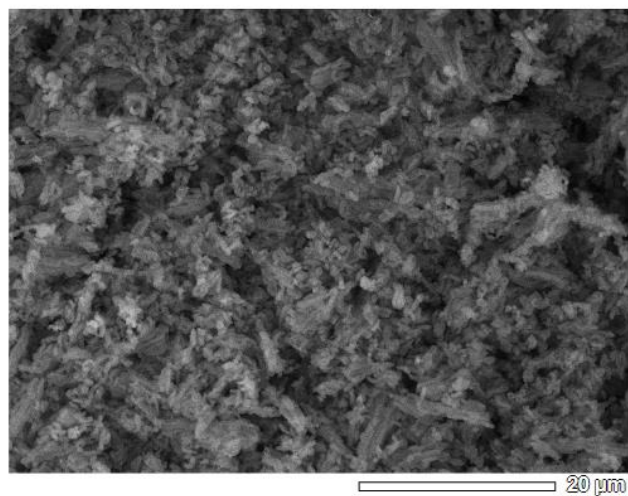

|            |              |
|------------|--------------|
| Title      | : IMG1       |
| Instrument | : 6510(LA)   |
| Volt       | : 15.00 kV   |
| Mag.       | : x 2,000    |
| Date       | : 2017/12/05 |
| Pixel      | : 1024 x 768 |

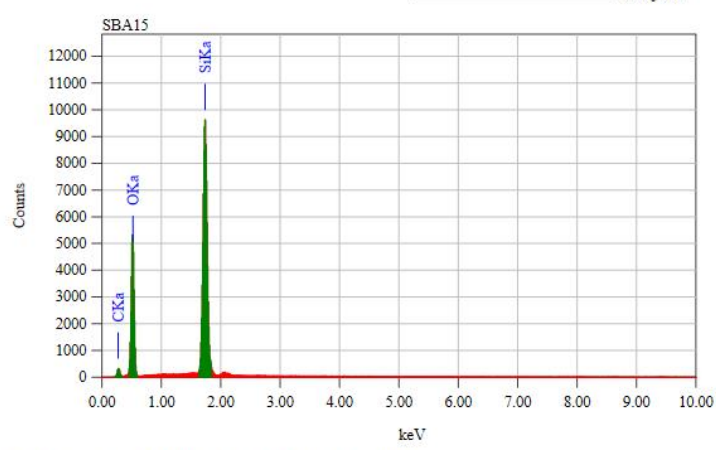

|                       |              |
|-----------------------|--------------|
| Acquisition Parameter |              |
| Instrument            | : 6510(LA)   |
| Acc. Voltage          | : 15.0 kV    |
| Probe Current         | : 1.00000 nA |
| PHA mode              | : T3         |
| Real Time             | : 51.34 sec  |
| Live Time             | : 50.00 sec  |
| Dead Time             | : 2 %        |
| Counting Rate         | : 3089 cps   |
| Energy Range          | : 0 - 20 keV |

ZAF Method Standardless Quantitative Analysis  
 Fitting Coefficient : 0.0675

| Element | (keV) | Mass%  | Sigma | Atom%  | Compound | Mass% | Cation | K       |
|---------|-------|--------|-------|--------|----------|-------|--------|---------|
| C K     | 0.277 | 11.19  | 0.13  | 16.72  |          |       |        | 2.0904  |
| O K     | 0.528 | 54.93  | 0.28  | 61.62  |          |       |        | 62.2424 |
| Si K    | 1.739 | 33.88  | 0.16  | 21.65  |          |       |        | 35.6673 |
| Total   |       | 100.00 |       | 100.00 |          |       |        |         |

Figure 6 SEM-EDX data of SBA-15

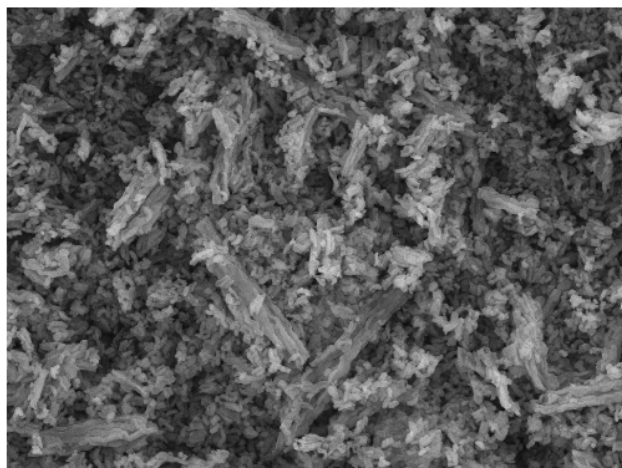

```

Title       : IMG1
-----
Instrument  : 6510(LA)
Volt       : 15.00 kV
Mag.      : x 2,000
Date      : 2017/12/05
Pixel     : 1024 x 768
  
```

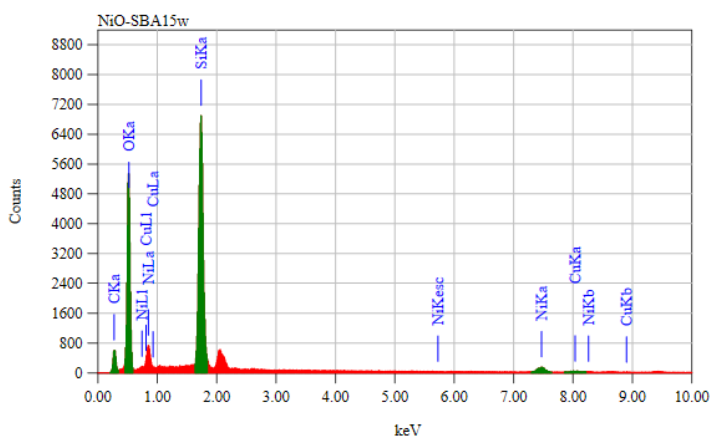

```

Acquisition Parameter
Instrument : 6510(LA)
Acc. Voltage : 15.0 kV
Probe Current: 1.00000 nA
PHA mode : T3
Real Time : 51.49 sec
Live Time : 50.00 sec
Dead Time : 2 %
Counting Rate: 3280 cps
Energy Range : 0 - 20 keV
  
```

ZAF Method Standardless Quantitative Analysis(Oxide)  
 Fitting Coefficient : 0.0897  
 Total Oxide : 24.0

| Element | (keV) | Mass%  | Sigma | Mol%   | Compound | Mass%  | Cation | K       |
|---------|-------|--------|-------|--------|----------|--------|--------|---------|
| C K     | 0.277 | 22.32  | 0.20  | 59.88  | C        | 22.32  | 0.00   | 9.6729  |
| O       |       | 36.89  |       |        |          |        |        |         |
| Si K    | 1.739 | 29.80  | 0.35  | 34.20  | SiO2     | 63.76  | 11.04  | 66.3028 |
| Ni K    | 7.471 | 8.27   | 0.30  | 4.54   | NiO      | 10.53  | 1.47   | 18.3397 |
| Cu K    | 8.040 | 2.71   | 0.23  | 1.38   | CuO      | 3.40   | 0.44   | 5.6846  |
| Total   |       | 100.00 |       | 100.00 |          | 100.00 | 12.96  |         |

Figure 7 SEM-EDX data of NiO/SBA-15w

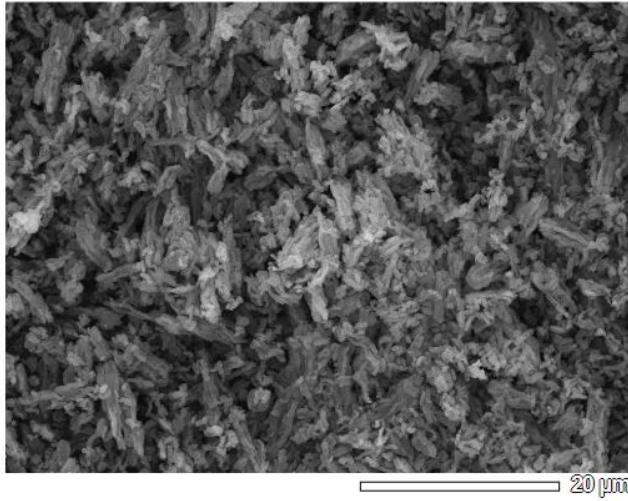

```

Title      : IMG1
-----
Instrument  : 6510(LA)
Volt       : 15.00 kV
Mag.       : x 2,000
Date       : 2017/12/05
Pixel      : 1024 x 768
  
```

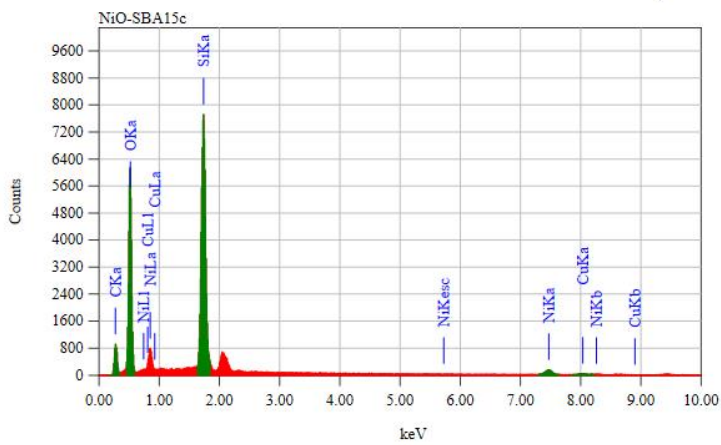

```

Acquisition Parameter
Instrument  : 6510(LA)
Acc. Voltage : 15.00 kV
Probe Current: 1.000000 nA
PHA mode   : T3
Real Time  : 51.69 sec
Live Time  : 50.00 sec
Dead Time  : 3 %
Counting Rate: 3690 cps
Energy Range : 0 - 20 keV
  
```

ZAF Method Standardless Quantitative Analysis(Oxide)  
Fitting Coefficient : 0.0911  
Total Oxide : 24.0

| Element | (keV) | Mass%  | Sigma | Mol%   | Compound | Mass%  | Cation | K       |
|---------|-------|--------|-------|--------|----------|--------|--------|---------|
| C       | 0.277 | 26.76  | 0.04  | 65.48  | C        | 26.76  | 0.00   | 12.5272 |
| O       |       | 34.86  |       |        |          |        |        |         |
| Si      | 1.739 | 28.22  | 0.19  | 29.52  | SiO2     | 60.36  | 11.06  | 64.7687 |
| Ni      | 7.471 | 7.70   | 0.14  | 3.86   | NiO      | 9.80   | 1.45   | 17.4505 |
| Cu      | 8.040 | 2.45   | 0.14  | 1.14   | CuO      | 3.07   | 0.43   | 5.2535  |
| Total   |       | 100.00 |       | 100.00 |          | 100.00 | 12.94  |         |

Figure 8 SEM-EDX data of NiO/SBA-15c

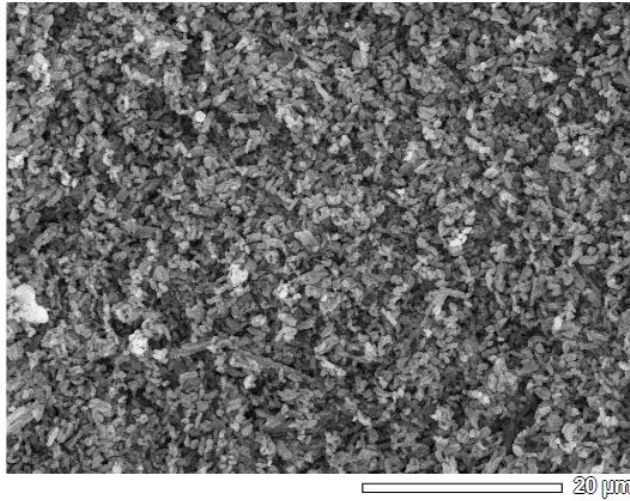

Title : IMG1  
 Instrument : 6510(LA)  
 Volt : 15.00 kV  
 Mag. : x 2,000  
 Date : 2017/12/05  
 Pixel : 1024 x 768

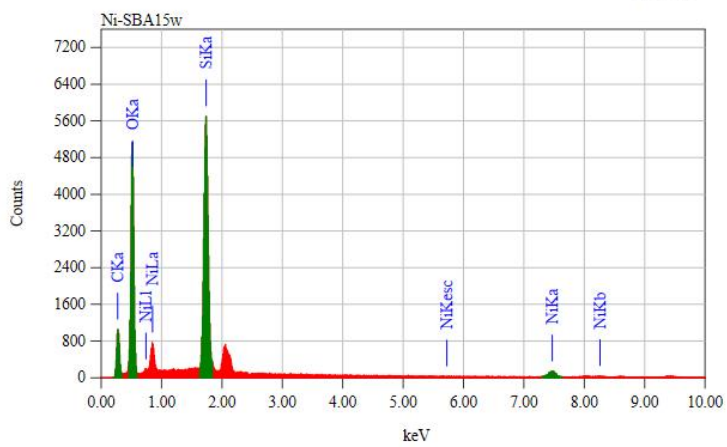

Acquisition Parameter  
 Instrument : 6510(LA)  
 Acc. Voltage : 15.0 kV  
 Probe Current: 1.00000 nA  
 PHA mode : T3  
 Real Time : 51.43 sec  
 Live Time : 50.00 sec  
 Dead Time : 2 %  
 Counting Rate: 3181 cps  
 Energy Range : 0 - 20 keV

ZAF Method Standardless Quantitative Analysis  
 Fitting Coefficient : 0.1089

| Element | (keV) | Mass%  | Sigma | Atom%  | Compound | Mass% | Cation | K       |
|---------|-------|--------|-------|--------|----------|-------|--------|---------|
| C K     | 0.277 | 22.05  | 0.03  | 31.11  |          |       |        | 6.8333  |
| O K     | 0.525 | 52.29  | 0.10  | 55.39  |          |       |        | 63.5668 |
| Si K    | 1.739 | 19.37  | 0.07  | 11.69  |          |       |        | 22.3965 |
| Ni K    | 7.471 | 6.29   | 0.10  | 1.82   |          |       |        | 7.2034  |
| Total   |       | 100.00 |       | 100.00 |          |       |        |         |

Figure 9 SEM-EDX data of Ni/SBA-15w

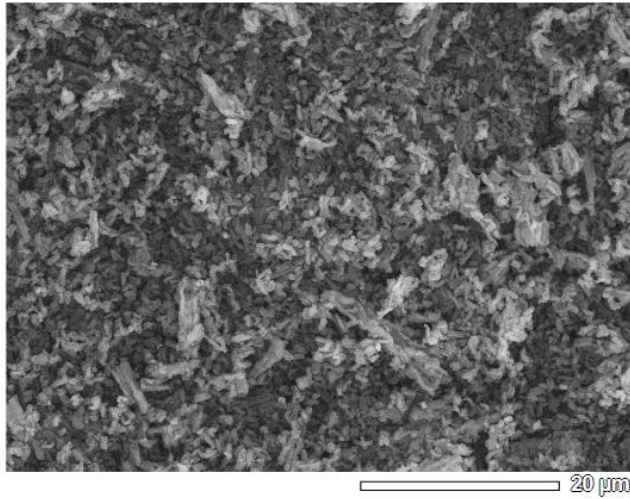

```

Title      : IMG1
-----
Instrument  : 6510(LA)
Volt       : 15.00 kV
Mag.       : x 2,000
Date       : 2017/12/05
Pixel      : 1024 x 768
  
```

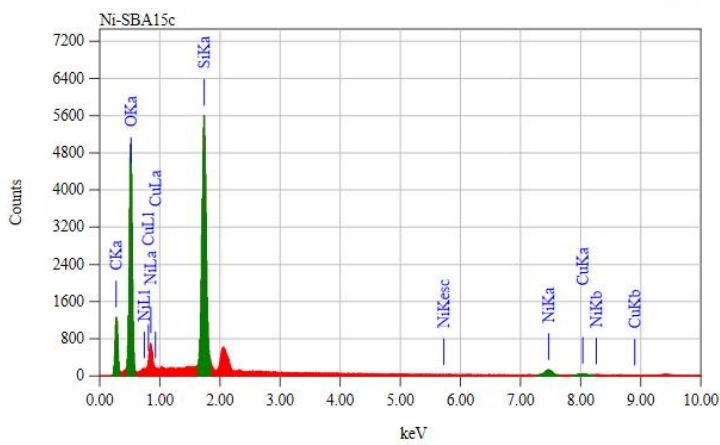

```

Acquisition Parameter
Instrument  : 6510(LA)
Acc. Voltage : 15.00 kV
Probe Current: 1.00000 nA
PHA mode   : T3
Real Time  : 51.36 sec
Live Time  : 50.00 sec
Dead Time  : 2 %
Counting Rate: 3099 cps
Energy Range : 0 - 20 keV
  
```

ZAF Method Standardless Quantitative Analysis  
Fitting Coefficient : 0.1032

| Element | (keV) | Mass%  | Sigma | Atom%  | Compound | Mass% | Cation | K       |
|---------|-------|--------|-------|--------|----------|-------|--------|---------|
| C       | 0.277 | 24.44  | 0.15  | 34.37  |          |       |        | 8.2354  |
| O       | 0.525 | 49.98  | 0.26  | 52.77  |          |       |        | 61.2895 |
| Si      | 1.739 | 17.70  | 0.11  | 10.65  |          |       |        | 21.1955 |
| Ni      | 7.471 | 5.61   | 0.17  | 1.61   |          |       |        | 6.7199  |
| Cu      | 8.040 | 2.26   | 0.14  | 0.60   |          |       |        | 2.5596  |
| Total   |       | 100.00 |       | 100.00 |          |       |        |         |

Figure 10 SEM-EDX data of Ni/SBA-15c



## ESI 3 Catalysts characterization using Gas Adsorption Analyzer

Quantachrome NovaWin - Data Acquisition and Reduction  
for NOVA instruments  
©1994-2010, Quantachrome Instruments  
version 11.0

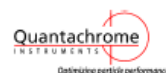

|                                         |                                 |                                                  |                 |
|-----------------------------------------|---------------------------------|--------------------------------------------------|-----------------|
| <b>Analysis</b>                         |                                 | <b>Report</b>                                    |                 |
| Operator: Lab Instrument TK - ITB       | Date: 2015/06/26                | Operator: Lab Instrument TK - ITB                | Date: 6/26/2015 |
| Sample ID: SBA-15                       | Filename:                       | C:\QCdata\Physisorb\lstn_C_20150625_1_SBA-15.qps |                 |
| Sample Desc:                            | Comment:                        | Ridwan Pratama Putra / TK ITB                    |                 |
| Sample weight: 0.0138 g                 | Sample Volume: 0.01619 cc       |                                                  |                 |
| Outgas Time: 3.0 hrs                    | Outgas Temp: 300.0 C            |                                                  |                 |
| Analysis gas: Nitrogen                  | Bath Temp: 77.3 K               |                                                  |                 |
| Press. Tolerance: 0.100/0.100 (ads/des) | Equil time: 60/60 sec (ads/des) | Equil timeout: 120/120 sec (ads/des)             |                 |
| Analysis Time: 610.2 min                | End of run: 2015/06/26 1:22:42  | Instrument: Nova Station C                       |                 |
| Cell ID: 99                             |                                 | F/W version: 0.00                                |                 |

### BJH Pore Size Distribution Desorption

#### Data Reduction Parameters Data

|                      |                            |                                 |                           |
|----------------------|----------------------------|---------------------------------|---------------------------|
| <u>t-Method</u>      | Calc. method: de Boer      |                                 |                           |
| <u>BJH/DH method</u> | Moving pt. avg.: off       | Ignoring P-tags below 0.35 P/Po |                           |
| <u>Adsorbate</u>     | Nitrogen                   | Temperature                     | 77.350K                   |
|                      | Molec. Wt.: 28.013 g       | Cross Section:                  | 16.200 Å <sup>2</sup>     |
|                      | Contact Angle: 0.0 degrees | Surf. Tension:                  | 8.850 erg/cm <sup>2</sup> |
|                      |                            | Liquid Density:                 | 0.808 g/cc                |

#### BJH Pore Size Distribution Desorption Data

| Diameter  | Pore Volume | Pore Surf Area      | dV(d)      | dS(d)                 | dV(logd)   | dS(logd)   |
|-----------|-------------|---------------------|------------|-----------------------|------------|------------|
| [Å]       | [cc/g]      | [m <sup>2</sup> /g] | [cc/Å/g]   | [m <sup>2</sup> /Å/g] | [cc/g]     | [cc/g]     |
| 34.1276   | 4.5095e-03  | 5.2855e+00          | 1.1921e-03 | 1.3973e+00            | 9.3585e-02 | 1.0969e+02 |
| 38.3303   | 8.4665e-03  | 9.4149e+00          | 8.5600e-04 | 8.9328e-01            | 7.5458e-02 | 7.8745e+01 |
| 43.1983   | 1.9111e-02  | 1.9272e+01          | 2.0818e-03 | 1.9277e+00            | 2.0683e-01 | 1.9152e+02 |
| 48.7520   | 1.3488e-01  | 1.1426e+02          | 1.9314e-02 | 1.5846e+01            | 2.1653e+00 | 1.7766e+03 |
| 56.1444   | 4.5515e-01  | 3.4243e+02          | 3.6433e-02 | 2.5957e+01            | 4.7003e+00 | 3.3487e+03 |
| 65.8539   | 8.2864e-01  | 5.6930e+02          | 3.5141e-02 | 2.1345e+01            | 5.3171e+00 | 3.2296e+03 |
| 77.7776   | 8.7347e-01  | 5.9235e+02          | 3.3908e-03 | 1.7438e+00            | 6.0579e-01 | 3.1155e+02 |
| 94.5308   | 8.9808e-01  | 6.0276e+02          | 1.2131e-03 | 5.1333e-01            | 2.6304e-01 | 1.1130e+02 |
| 121.7391  | 9.2242e-01  | 6.1076e+02          | 7.1312e-04 | 2.3431e-01            | 1.9858e-01 | 6.5248e+01 |
| 174.1200  | 9.4635e-01  | 6.1626e+02          | 3.3880e-04 | 7.7832e-02            | 1.3395e-01 | 3.0772e+01 |
| 315.6733  | 9.7743e-01  | 6.2019e+02          | 1.4627e-04 | 1.8535e-02            | 1.0218e-01 | 1.2947e+01 |
| 1252.8006 | 1.0223e+00  | 6.2163e+02          | 2.7023e-05 | 8.6281e-04            | 6.4743e-02 | 2.0672e+00 |

#### BJH desorption summary

Surface Area = 621.628 m<sup>2</sup>/g  
Pore Volume = 1.022 cc/g  
Pore Diameter Dv(d) = 56.144 Å

Figure 11 BJH pore size distribution desorption of SBA-15

|                                         |                                   |                                      |                 |
|-----------------------------------------|-----------------------------------|--------------------------------------|-----------------|
| <b>Analysis</b>                         |                                   | <b>Report</b>                        |                 |
| Operator:nova                           | Date:2017/11/29                   | Operator:nova                        | Date:11/29/2017 |
| Sample ID: NiO-w                        | Filename:                         | C:\QCdata\Physisorb\NiO-w.qps        |                 |
| Sample Desc:                            | Comment:                          | Endah                                |                 |
| Sample weight: 0.0408 g                 | Sample Volume: 0.01196 cc         | Sample Density: 3.41 g/cc            |                 |
| Outgas Time: 3.0 hrs                    | Outgas Temp: 300.0 C              |                                      |                 |
| Analysis gas: Nitrogen                  | Bath Temp: 77.3 K                 |                                      |                 |
| Press. Tolerance: 0.050/0.050 (ads/des) | Equil time: 120/120 sec (ads/des) | Equil timeout: 240/240 sec (ads/des) |                 |
| Analysis Time: 903.9 min                | End of run: 2017/11/29 9:04:57    | Instrument: Nova Station A           |                 |
| Cell ID: 81                             |                                   | F/W version: 0.00                    |                 |

### BJH Pore Size Distribution Desorption

#### Data Reduction Parameters Data

|                      |                            |                                 |               |
|----------------------|----------------------------|---------------------------------|---------------|
| <b>t-Method</b>      | Calc. method: de Boer      |                                 |               |
| <b>BJH/DH method</b> | Moving pt. avg.: off       | Ignoring P-tags below 0.35 P/Po |               |
| <b>Adsorbate</b>     | Nitrogen                   | Temperature                     | 77.350K       |
|                      | Molec. Wt.: 28.013 g       | Cross Section:                  | 16.200 Å²     |
|                      | Contact Angle: 0.0 degrees | Surf. Tension:                  | 8.850 erg/cm² |
|                      |                            | Liquid Density:                 | 0.808 g/cc    |

#### BJH Pore Size Distribution Desorption Data

| Diameter | Pore Volume | Pore Surf Area | dV(d)      | dS(d)      | dV(logd)   | dS(logd)   |
|----------|-------------|----------------|------------|------------|------------|------------|
| [Å]      | [cc/g]      | [m²/g]         | [cc/Å/g]   | [m²/Å/g]   | [cc/g]     | [cc/g]     |
| 36.0180  | 0.0000e+00  | 0.0000e+00     | 0.0000e+00 | 0.0000e+00 | 0.0000e+00 | 0.0000e+00 |
| 42.8584  | 7.4683e-03  | 6.9702e+00     | 1.0472e-03 | 9.7736e-01 | 1.0310e-01 | 9.6228e+01 |
| 52.8999  | 1.4615e-01  | 1.1184e+02     | 1.0708e-02 | 8.0969e+00 | 1.2978e+00 | 9.8131e+02 |
| 67.2608  | 7.3224e-01  | 4.6038e+02     | 3.7163e-02 | 2.2101e+01 | 5.7291e+00 | 3.4071e+03 |
| 90.3016  | 7.9354e-01  | 4.8754e+02     | 2.0226e-03 | 8.9593e-01 | 4.1658e-01 | 1.8453e+02 |
| 133.3832 | 8.2719e-01  | 4.9763e+02     | 6.0246e-04 | 1.8067e-01 | 1.8229e-01 | 5.4668e+01 |
| 267.2283 | 8.5817e-01  | 5.0226e+02     | 1.4624e-04 | 2.1890e-02 | 8.5056e-02 | 1.2732e+01 |
| 966.1222 | 8.7349e-01  | 5.0290e+02     | 1.2919e-05 | 5.3489e-04 | 2.4673e-02 | 1.0215e+00 |

#### BJH desorption summary

Surface Area = 502.898 m²/g  
Pore Volume = 0.873 cc/g  
Pore Diameter Dv(d) = 67.261 Å

Figure 12 BJH pore size distribution desorption of NiO/SBA-15w

|                                         |                                   |                                      |                 |
|-----------------------------------------|-----------------------------------|--------------------------------------|-----------------|
| <b>Analysis</b>                         |                                   | <b>Report</b>                        |                 |
| Operator:nova                           | Date:2017/11/29                   | Operator:nova                        | Date:11/29/2017 |
| Sample ID: NiO-c                        | Filename:                         | C:\QCdata\Physisorb\NiO-c.qps        |                 |
| Sample Desc:                            | Comment:                          | Endah                                |                 |
| Sample weight: 0.0416 g                 | Sample Volume: 0.0122 cc          | Sample Density: 3.41 g/cc            |                 |
| Outgas Time: 3.0 hrs                    | Outgas Temp: 300.0 C              |                                      |                 |
| Analysis gas: Nitrogen                  | Bath Temp: 77.3 K                 |                                      |                 |
| Press. Tolerance: 0.050/0.050 (ads/des) | Equil time: 120/120 sec (ads/des) | Equil timeout: 240/240 sec (ads/des) |                 |
| Analysis Time: 909.4 min                | End of run: 2017/11/29 9:10:24    | Instrument: Nova Station B           |                 |
| Cell ID: 82                             |                                   | F/W version: 0.00                    |                 |

**BJH Pore Size Distribution Desorption**

**Data Reduction Parameters Data**

|               |                            |                                 |               |
|---------------|----------------------------|---------------------------------|---------------|
| t-Method      | Calc. method: de Boer      |                                 |               |
| BJH/DH method | Moving pt. avg.: off       | Ignoring P-tags below 0.35 P/Po |               |
| Adsorbate     | Nitrogen                   | Temperature                     | 77.350K       |
|               | Molec. Wt.: 28.013 g       | Cross Section:                  | 16.200 Å²     |
|               | Contact Angle: 0.0 degrees | Surf. Tension:                  | 8.850 erg/cm² |
|               |                            | Liquid Density:                 | 0.808 g/cc    |

**BJH Pore Size Distribution Desorption Data**

| Diameter | Pore Volume | Pore Surf Area | dV(d)      | dS(d)      | dV(logd)   | dS(logd)   |
|----------|-------------|----------------|------------|------------|------------|------------|
| [Å]      | [cc/g]      | [m²/g]         | [cc/Å/g]   | [m²/Å/g]   | [cc/g]     | [cc/g]     |
| 35.8452  | 0.0000e+00  | 0.0000e+00     | 0.0000e+00 | 0.0000e+00 | 0.0000e+00 | 0.0000e+00 |
| 43.5776  | 9.4980e-03  | 8.7183e+00     | 1.0826e-03 | 9.9373e-01 | 1.0826e-01 | 9.9375e+01 |
| 53.5912  | 1.3559e-01  | 1.0283e+02     | 1.1204e-02 | 8.3626e+00 | 1.3775e+00 | 1.0281e+03 |
| 66.3248  | 7.1368e-01  | 4.5147e+02     | 4.0673e-02 | 2.4530e+01 | 6.1877e+00 | 3.7318e+03 |
| 88.6192  | 7.8602e-01  | 4.8413e+02     | 2.3816e-03 | 1.0750e+00 | 4.8117e-01 | 2.1718e+02 |
| 132.4104 | 8.2151e-01  | 4.9485e+02     | 6.2035e-04 | 1.8740e-01 | 1.8616e-01 | 5.6237e+01 |
| 289.3866 | 8.5754e-01  | 4.9983e+02     | 1.4034e-04 | 1.9398e-02 | 8.7018e-02 | 1.2028e+01 |
| 880.4192 | 8.9006e-01  | 5.0131e+02     | 3.5147e-05 | 1.5968e-03 | 6.4125e-02 | 2.9134e+00 |

**BJH desorption summary**

Surface Area = 501.305 m²/g  
Pore Volume = 0.890 cc/g  
Pore Diameter Dv(d) = 66.325 Å

Figure 13 BJH pore size distribution desorption of NiO/SBA-15c

|                                         |                                   |                                      |                 |
|-----------------------------------------|-----------------------------------|--------------------------------------|-----------------|
| <b>Analysis</b>                         |                                   | <b>Report</b>                        |                 |
| Operator:nova                           | Date:2017/11/29                   | Operator:nova                        | Date:11/29/2017 |
| Sample ID: Ni-w                         | Filename:                         | C:\QCdata\Physisorb\Ni-w.qps         |                 |
| Sample Desc:                            | Comment:                          | Endah                                |                 |
| Sample weight: 0.0455 g                 | Sample Volume: 0.01334 cc         | Sample Density: 3.41 g/cc            |                 |
| Outgas Time: 3.0 hrs                    | Outgas Temp: 300.0 C              |                                      |                 |
| Analysis gas: Nitrogen                  | Bath Temp: 77.3 K                 |                                      |                 |
| Press. Tolerance: 0.050/0.050 (ads/des) | Equil time: 120/120 sec (ads/des) | Equil timeout: 240/240 sec (ads/des) |                 |
| Analysis Time: 914.8 min                | End of run: 2017/11/29 9:15:51    | Instrument: Nova Station C           |                 |
| Cell ID: 83                             |                                   | F/W version: 0.00                    |                 |

### BJH Pore Size Distribution Desorption

#### Data Reduction Parameters Data

|               |                            |                                 |               |
|---------------|----------------------------|---------------------------------|---------------|
| t-Method      | Calc. method: de Boer      |                                 |               |
| BJH/DH method | Moving pt. avg.: off       | Ignoring P-tags below 0.35 P/Po |               |
| Adsorbate     | Nitrogen                   | Temperature                     | 77.350K       |
|               | Molec. Wt.: 28.013 g       | Cross Section:                  | 16.200 Å²     |
|               | Contact Angle: 0.0 degrees | Surf. Tension:                  | 8.850 erg/cm² |
|               |                            | Liquid Density:                 | 0.808 g/cc    |

#### BJH Pore Size Distribution Desorption Data

| Diameter | Pore Volume | Pore Surf Area | dV(d)      | dS(d)      | dV(logd)   | dS(logd)   |
|----------|-------------|----------------|------------|------------|------------|------------|
| [Å]      | [cc/g]      | [m²/g]         | [cc/Å/g]   | [m²/Å/g]   | [cc/g]     | [cc/g]     |
| 36.0143  | 4.6368e-02  | 5.1500e+01     | 7.0797e-03 | 7.8632e+00 | 5.8547e-01 | 6.5026e+02 |
| 43.0673  | 8.7351e-02  | 8.9564e+01     | 5.4235e-03 | 5.0372e+00 | 5.3644e-01 | 4.9824e+02 |
| 52.8868  | 2.2592e-01  | 1.9437e+02     | 1.1469e-02 | 8.6743e+00 | 1.3905e+00 | 1.0517e+03 |
| 66.6482  | 8.0232e-01  | 5.4030e+02     | 3.7331e-02 | 2.2405e+01 | 5.7031e+00 | 3.4228e+03 |
| 89.8172  | 8.7436e-01  | 5.7239e+02     | 2.3316e-03 | 1.0384e+00 | 4.7741e-01 | 2.1262e+02 |
| 105.6458 | 8.7436e-01  | 5.7239e+02     | 0.0000e+00 | 0.0000e+00 | 0.0000e+00 | 0.0000e+00 |

#### BJH desorption summary

Surface Area = 572.386 m²/g  
Pore Volume = 0.874 cc/g  
Pore Diameter Dv(d) = 66.648 Å

Figure 14 BJH pore size distribution desorption of Ni/SBA-15w

|                                         |                                   |                                      |                 |
|-----------------------------------------|-----------------------------------|--------------------------------------|-----------------|
| <b>Analysis</b>                         |                                   | <b>Report</b>                        |                 |
| Operator:nova                           | Date:2017/11/30                   | Operator:nova                        | Date:11/30/2017 |
| Sample ID: Ni-c                         | Filename:                         | C:\QCdata\Physisorb\Ni-c.qps         |                 |
| Sample Desc:                            | Comment:                          | Endah                                |                 |
| Sample weight: 0.0471 g                 | Sample Volume: 0.013812 cc        | Sample Density: 3.41 g/cc            |                 |
| Outgas Time: 3.0 hrs                    | Outgas Temp: 300.0 C              |                                      |                 |
| Analysis gas: Nitrogen                  | Bath Temp: 77.3 K                 |                                      |                 |
| Press. Tolerance: 0.050/0.050 (ads/des) | Equil time: 120/120 sec (ads/des) | Equil timeout: 240/240 sec (ads/des) |                 |
| Analysis Time: 681.1 min                | End of run: 2017/11/30 5:28:11    | Instrument: Nova Station A           |                 |
| Cell ID: 81                             |                                   | F/W version: 0.00                    |                 |

**BJH Pore Size Distribution Desorption**

**Data Reduction Parameters Data**

|                      |                            |                                 |                           |
|----------------------|----------------------------|---------------------------------|---------------------------|
| <u>t-Method</u>      | Calc. method: de Boer      |                                 |                           |
| <u>BJH/DH method</u> | Moving pt. avg.: off       | Ignoring P-tags below 0.35 P/Po |                           |
| <u>Adsorbate</u>     | Nitrogen                   | Temperature                     | 77.350K                   |
|                      | Molec. Wt.: 28.013 g       | Cross Section:                  | 16.200 Å <sup>2</sup>     |
|                      | Contact Angle: 0.0 degrees | Surf. Tension:                  | 8.850 erg/cm <sup>2</sup> |
|                      |                            | Liquid Density:                 | 0.808 g/cc                |

**BJH Pore Size Distribution Desorption Data**

| Diameter | Pore Volume | Pore Surf Area      | dV(d)      | dS(d)                 | dV(logd)   | dS(logd)   |
|----------|-------------|---------------------|------------|-----------------------|------------|------------|
| [Å]      | [cc/g]      | [m <sup>2</sup> /g] | [cc/Å/g]   | [m <sup>2</sup> /Å/g] | [cc/g]     | [cc/g]     |
| 36.0393  | 0.0000e+00  | 0.0000e+00          | 0.0000e+00 | 0.0000e+00            | 0.0000e+00 | 0.0000e+00 |
| 43.5066  | 4.4517e-03  | 4.0929e+00          | 5.3974e-04 | 4.9624e-01            | 5.3907e-02 | 4.9562e+01 |
| 53.4530  | 6.7699e-02  | 5.1422e+01          | 5.4313e-03 | 4.0643e+00            | 6.6583e-01 | 4.9825e+02 |
| 66.7117  | 5.7706e-01  | 3.5683e+02          | 3.4249e-02 | 2.0536e+01            | 5.2391e+00 | 3.1413e+03 |
| 89.7024  | 6.2815e-01  | 3.7961e+02          | 1.6421e-03 | 7.3224e-01            | 3.3574e-01 | 1.4971e+02 |
| 135.7293 | 6.5471e-01  | 3.8744e+02          | 4.3591e-04 | 1.2847e-01            | 1.3391e-01 | 3.9465e+01 |
| 292.7839 | 6.8119e-01  | 3.9106e+02          | 1.0457e-04 | 1.4287e-02            | 6.5864e-02 | 8.9983e+00 |
| 859.5996 | 6.8942e-01  | 3.9144e+02          | 9.3467e-06 | 4.3493e-04            | 1.6751e-02 | 7.7946e-01 |

**BJH desorption summary**

Surface Area = 391.443 m<sup>2</sup>/g  
Pore Volume = 0.689 cc/g  
Pore Diameter Dv(d) = 66.712 Å

Figure 15 BJH pore size distribution desorption of Ni/SBA-15c

## ESI 4 Characterization of liquid product using GC-MS

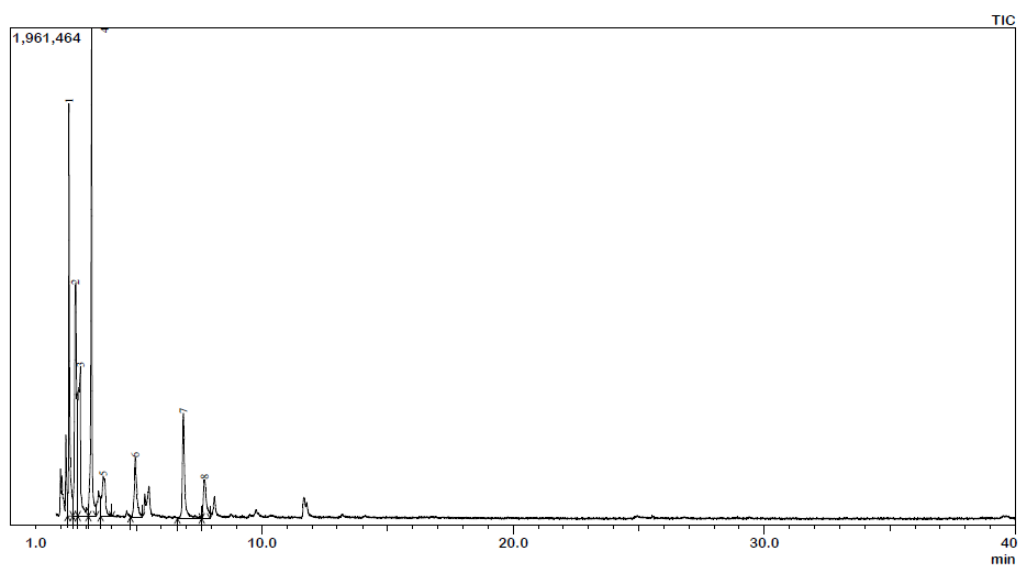

Figure 16 Chromatogram of pyrolyzed  $\alpha$ -cellulose

Table 1 Composition of Pyrolyzed  $\alpha$ -cellulose

| Peak # | R.time | Area    | Area (%) | Name                   | Molecular Formula                             |
|--------|--------|---------|----------|------------------------|-----------------------------------------------|
| 1      | 2.3180 | 4204868 | 15.41    | Formic acid            | CH <sub>2</sub> O <sub>2</sub>                |
| 2      | 2.5670 | 5671987 | 20.78    | 2,3-Butanedione        | C <sub>4</sub> H <sub>6</sub> O <sub>2</sub>  |
| 3      | 2.7710 | 4095677 | 15.01    | Acetic acid            | C <sub>2</sub> H <sub>4</sub> O <sub>2</sub>  |
| 4      | 3.2190 | 6169920 | 22.61    | 1-hydroxy-2-Propanone  | C <sub>3</sub> H <sub>6</sub> O <sub>2</sub>  |
| 5      | 3.6790 | 1510617 | 5.53     | Oxirane (butoxymethyl) | C <sub>7</sub> H <sub>14</sub> O <sub>2</sub> |
| 6      | 4.9600 | 1672250 | 6.13     | 1-Hydroxy-2-Butanone   | C <sub>4</sub> H <sub>8</sub> O <sub>2</sub>  |
| 7      | 6.8740 | 2696886 | 9.88     | 2-Furancarboxaldehyde  | C <sub>5</sub> H <sub>4</sub> O <sub>2</sub>  |
| 8      | 7.7130 | 1271932 | 4.66     | 2-Furanmethanol        | C <sub>5</sub> H <sub>6</sub> O <sub>2</sub>  |

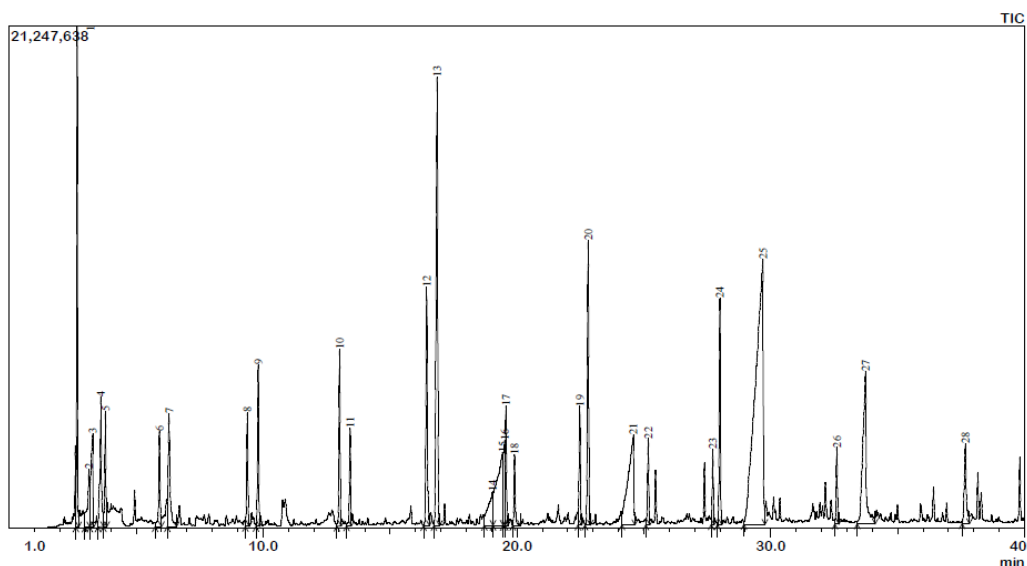

Figure 17 Chromatogram of hydrocracking liquid product with no catalyst

Table 2 Compositions of hydrocracking liquid product with no catalyst

| Peak # | R.time | Area      | Area (%) | Name                  | Molecular Formula                              |
|--------|--------|-----------|----------|-----------------------|------------------------------------------------|
| 1      | 2.674  | 44348656  | 4.61     | Hexane                | C <sub>6</sub> H <sub>14</sub>                 |
| 2      | 3.139  | 12849517  | 1.34     | Benzene               | C <sub>6</sub> H <sub>6</sub>                  |
| 3      | 3.288  | 21626619  | 2.25     | Acetic acid           | C <sub>2</sub> H <sub>4</sub> O <sub>2</sub>   |
| 4      | 3.605  | 23343723  | 2.43     | 1-Heptanol            | C <sub>7</sub> H <sub>16</sub> O               |
| 5      | 3.786  | 14442683  | 1.5      | Heptane               | C <sub>7</sub> H <sub>16</sub>                 |
| 6      | 5.917  | 15203284  | 1.58     | 1-Octene              | C <sub>8</sub> H <sub>16</sub>                 |
| 7      | 6.292  | 26063881  | 2.71     | 2-Furancarboxaldehyde | C <sub>5</sub> H <sub>4</sub> O <sub>2</sub>   |
| 8      | 9.379  | 15331107  | 1.59     | 1-Nonene              | C <sub>9</sub> H <sub>18</sub>                 |
| 9      | 9.81   | 21513058  | 2.24     | Nonane                | C <sub>9</sub> H <sub>20</sub>                 |
| 10     | 13.015 | 23959665  | 2.49     | 1-Decene              | C <sub>10</sub> H <sub>20</sub>                |
| 11     | 13.423 | 13233467  | 1.38     | Decane                | C <sub>10</sub> H <sub>22</sub>                |
| 12     | 16.447 | 38749069  | 4.03     | 1-Undecene            | C <sub>11</sub> H <sub>22</sub>                |
| 13     | 16.857 | 83410605  | 8.67     | Dodecane              | C <sub>12</sub> H <sub>26</sub>                |
| 14     | 19.043 | 18039188  | 1.87     | 6-Dodecanone          | C <sub>12</sub> H <sub>18</sub> O              |
| 15     | 19.436 | 50960032  | 5.3      | Decanal               | C <sub>10</sub> H <sub>20</sub> O              |
| 16     | 19.52  | 15027160  | 1.56     | Octanoic acid         | C <sub>8</sub> H <sub>16</sub> O <sub>2</sub>  |
| 17     | 19.57  | 14892929  | 1.55     | 1-Dodecanol           | C <sub>12</sub> H <sub>26</sub> O              |
| 18     | 19.909 | 10387174  | 1.08     | Dodecane              | C <sub>12</sub> H <sub>26</sub>                |
| 19     | 22.477 | 16751172  | 1.74     | 1-Tridecene           | C <sub>13</sub> H <sub>26</sub>                |
| 20     | 22.811 | 42679952  | 4.44     | Tetradecane           | C <sub>14</sub> H <sub>30</sub>                |
| 21     | 24.589 | 57784646  | 6.01     | Decanoic acid         | C <sub>10</sub> H <sub>20</sub> O <sub>2</sub> |
| 22     | 25.175 | 12849282  | 1.34     | 1-Tridecene           | C <sub>13</sub> H <sub>26</sub>                |
| 23     | 27.716 | 10220151  | 1.06     | 1-Tridecene           | C <sub>13</sub> H <sub>26</sub>                |
| 24     | 27.998 | 31775704  | 3.3      | Nonadecane            | C <sub>19</sub> H <sub>40</sub>                |
| 25     | 29.692 | 234309295 | 24,35    | Dodecanoic acid       | C <sub>12</sub> H <sub>24</sub> O <sub>2</sub> |
| 26     | 32.606 | 10676555  | 1,11     | Octadecane            | C <sub>18</sub> H <sub>38</sub>                |
| 27     | 33.736 | 62485364  | 6,49     | Tetradecanoic acid    | C <sub>14</sub> H <sub>28</sub> O <sub>2</sub> |
| 28     | 37.671 | 19177174  | 1,99     | Pentadecanoic acid    | C <sub>15</sub> H <sub>30</sub> O <sub>2</sub> |

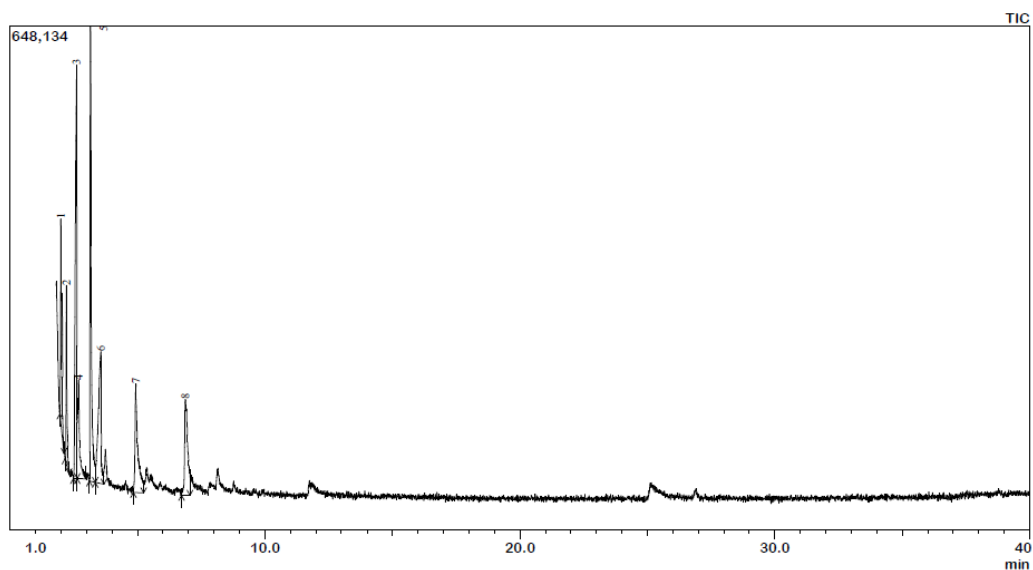

Figure 18 Chromatogram of hydrocracking liquid product with SBA-15

Table 3 Compositions of hydrocracking liquid product with SBA-15

| Peak # | R.time | Area    | Area (%) | Name                          | Molecular Formula                            |
|--------|--------|---------|----------|-------------------------------|----------------------------------------------|
| 1      | 1.992  | 790824  | 8.37     | Formaldehyde                  | CH <sub>2</sub> O                            |
| 2      | 2.207  | 513928  | 5.44     | 2-Propanone                   | C <sub>3</sub> H <sub>6</sub> O              |
| 3      | 2.605  | 2080643 | 22.01    | Acetic acid                   | C <sub>2</sub> H <sub>4</sub> O <sub>2</sub> |
| 4      | 2.688  | 640723  | 6.78     | Propanoic acid                | C <sub>3</sub> H <sub>6</sub> O <sub>2</sub> |
| 5      | 3.152  | 1922726 | 20.34    | 1-hydroxy-2-Propanone         | C <sub>3</sub> H <sub>6</sub> O <sub>2</sub> |
| 6      | 3.558  | 1352436 | 14.31    | Propanoic acid                | C <sub>3</sub> H <sub>6</sub> O <sub>2</sub> |
| 7      | 4.931  | 1084382 | 11.47    | 1-HYDROXY-2-BUTANONE          | C <sub>4</sub> H <sub>8</sub> O <sub>2</sub> |
| 8      | 6.876  | 1066032 | 11.28    | 2-Cyanomethyl-tetrahydrofuran | C <sub>6</sub> H <sub>9</sub> NO             |



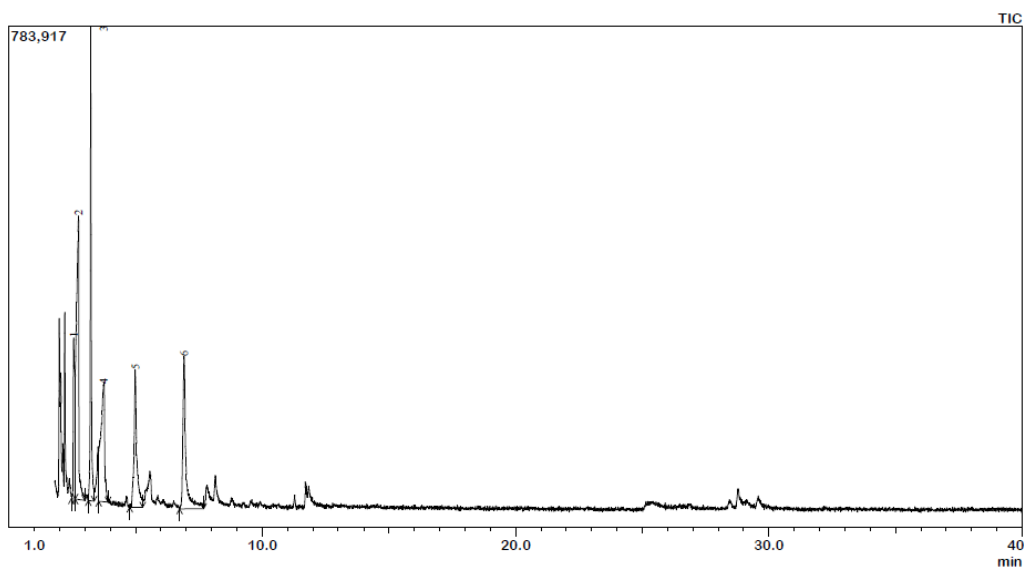

Figure 19 Chromatogram of hydrocracking liquid product with NiO/SBA-15w

Table 4 Compositions of hydrocracking liquid product with NiO/SBA-15w

| Peak # | R.time | Area    | Area (%) | Name                  | Molecular Formula                            |
|--------|--------|---------|----------|-----------------------|----------------------------------------------|
| 1      | 2.552  | 1049932 | 9.04     | 2,3-Butanedione       | C <sub>4</sub> H <sub>6</sub> O <sub>2</sub> |
| 2      | 2.743  | 3006366 | 25.89    | Acetic acid           | C <sub>2</sub> H <sub>4</sub> O <sub>2</sub> |
| 3      | 3.225  | 2047609 | 17.63    | 1-hydroxy-2-Propanone | C <sub>3</sub> H <sub>6</sub> O <sub>2</sub> |
| 4      | 3.728  | 1934012 | 16.65    | Propanoic acid        | C <sub>3</sub> H <sub>6</sub> O <sub>2</sub> |
| 5      | 4.984  | 1623171 | 13.98    | 1-HYDROXY-2-BUTANONE  | C <sub>4</sub> H <sub>8</sub> O <sub>2</sub> |
| 6      | 6.911  | 1951691 | 16.81    | 2-Furancarboxaldehyde | C <sub>5</sub> H <sub>4</sub> O <sub>2</sub> |

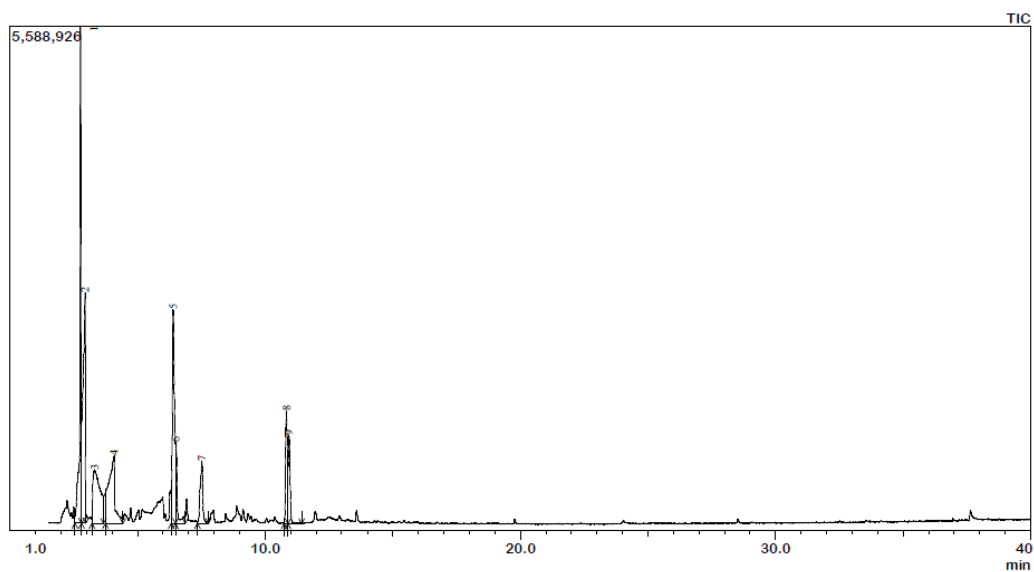

Figure 20 Chromatogram of hydrocracking liquid product with NiO/SBA-15c

Table 5 Compositions of hydrocracking liquid product with NiO/SBA-15c

| Peak # | R.time | Area     | Area (%) | Name                    | Molecular Formula                             |
|--------|--------|----------|----------|-------------------------|-----------------------------------------------|
| 1      | 2.762  | 15800431 | 17.55    | 3-methyl-Pentane        | C <sub>6</sub> H <sub>14</sub>                |
| 2      | 2.943  | 15854468 | 17.61    | Acetic acid             | C <sub>2</sub> H <sub>4</sub> O <sub>2</sub>  |
| 3      | 3.315  | 11498201 | 12.77    | 1-hydroxy- 2-Propanone  | C <sub>3</sub> H <sub>6</sub> O <sub>2</sub>  |
| 4      | 4.082  | 12965236 | 14.4     | Propanoic acid          | C <sub>3</sub> H <sub>6</sub> O <sub>2</sub>  |
| 5      | 6.392  | 13832871 | 15.37    | 2-Furancarboxaldehyde   | C <sub>5</sub> H <sub>4</sub> O <sub>2</sub>  |
| 6      | 6.497  | 3915768  | 4.35     | 1,2-Bis(vinyloxy)ethane | C <sub>6</sub> H <sub>10</sub> O <sub>2</sub> |
| 7      | 7.516  | 4983590  | 5.54     | Acetol acetate          | C <sub>5</sub> H <sub>8</sub> O <sub>3</sub>  |
| 8      | 10.829 | 6086867  | 6.76     | 3,3-Dimethyl-2-butanone | C <sub>6</sub> H <sub>12</sub> O              |
| 9      | 10.931 | 5071794  | 5.63     | TRIMETHYLSILYL          | C <sub>14</sub> H <sub>20</sub>               |

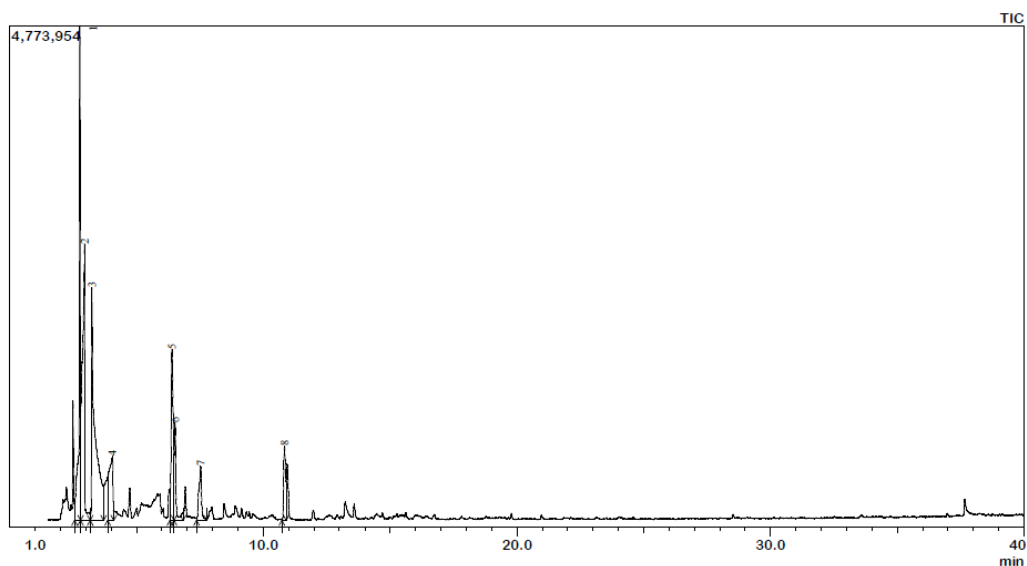

Figure 21 Chromatogram of hydrocracking liquid product with Ni/SBA-15w

Table 6 Compositions of hydrocracking liquid product with Ni/SBA-15w

| Peak # | R.time | Area     | Area (%) | Name                    | Molecular Formula                              |
|--------|--------|----------|----------|-------------------------|------------------------------------------------|
| 1      | 2.762  | 14062415 | 17.62    | Ethanedioic acid        | C <sub>10</sub> H <sub>18</sub> O <sub>4</sub> |
| 2      | 2.948  | 17647297 | 22.11    | Acetic acid             | C <sub>2</sub> H <sub>4</sub> O <sub>2</sub>   |
| 3      | 3.24   | 20546243 | 25.74    | 1-hydroxy-2-Propanone   | C <sub>3</sub> H <sub>6</sub> O <sub>2</sub>   |
| 4      | 4.053  | 6729774  | 8.43     | Propanoic acid          | C <sub>3</sub> H <sub>6</sub> O <sub>2</sub>   |
| 5      | 6.399  | 9329816  | 11.69    | 2-Furancarboxaldehyde   | C <sub>5</sub> H <sub>4</sub> O <sub>2</sub>   |
| 6      | 6.516  | 4113419  | 5.15     | 2-(ethenyloxy)-Propane  | C <sub>5</sub> H <sub>10</sub> O               |
| 7      | 7.524  | 3775825  | 4.73     | Acetol acetate          | C <sub>5</sub> H <sub>8</sub> O <sub>3</sub>   |
| 8      | 10.832 | 3602735  | 4.51     | 3,3-Dimethyl-2-butanone | C <sub>6</sub> H <sub>12</sub> O               |

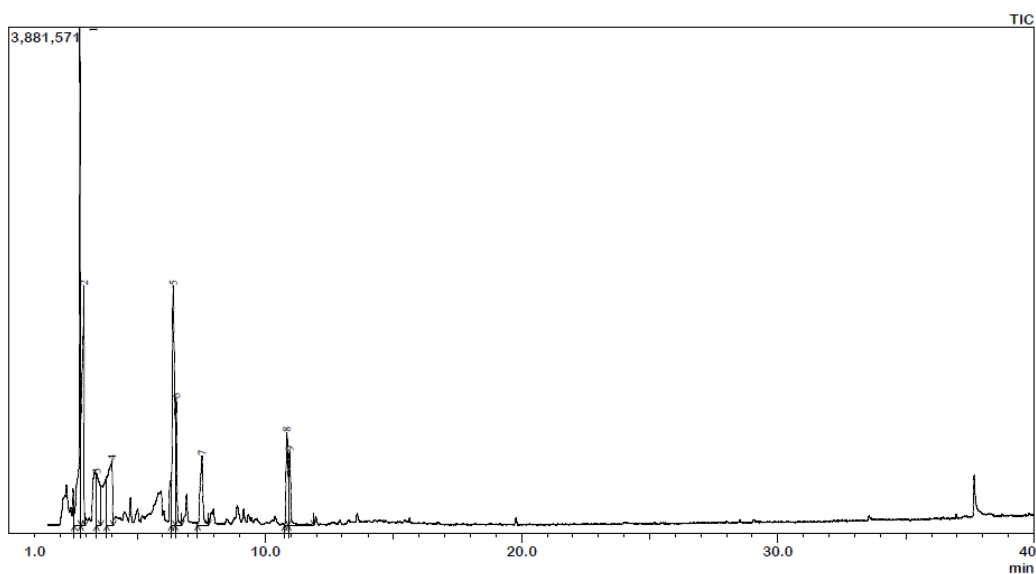

Figure 22 Chromatogram of hydrocracking liquid product with Ni/SBA-15c

Table 7 Compositions of hydrocracking liquid product with Ni/SBA-15c

| Peak # | R.time | Area     | Area (%) | Name                                | Molecular Formula                                |
|--------|--------|----------|----------|-------------------------------------|--------------------------------------------------|
| 1      | 2.766  | 10765262 | 19.43    | 3-methyl-Pentane                    | C <sub>6</sub> H <sub>14</sub>                   |
| 2      | 2.919  | 9960407  | 17.98    | Acetic acid                         | C <sub>2</sub> H <sub>4</sub> O <sub>2</sub>     |
| 3      | 3.415  | 3593105  | 6.49     | 1,4-DIBUTOXYBUTANE                  | C <sub>12</sub> H <sub>26</sub> O <sub>2</sub>   |
| 4      | 4.019  | 5930568  | 10.7     | Propanoic acid                      | C <sub>3</sub> H <sub>6</sub> O <sub>2</sub>     |
| 5      | 6.407  | 11044880 | 19.94    | 2-Furancarboxaldehyde               | C <sub>5</sub> H <sub>4</sub> O <sub>2</sub>     |
| 6      | 6.518  | 3651060  | 6.59     | 2,3,6-TRIMETHYLPHENYLBUTAN-2-ONE-D5 | C <sub>13</sub> H <sub>13</sub> D <sub>5</sub> O |
| 7      | 7.526  | 4026237  | 7.27     | Acetol acetate                      | C <sub>5</sub> H <sub>8</sub> O <sub>3</sub>     |
| 8      | 10.841 | 3425758  | 6.18     | 3,3-Dimethyl-2-butanone             | C <sub>6</sub> H <sub>12</sub> O                 |
| 9      | 10.945 | 3005578  | 5.42     | ETHYLHEXATHIADAMANTANE              | C <sub>6</sub> H <sub>8</sub> S <sub>6</sub>     |

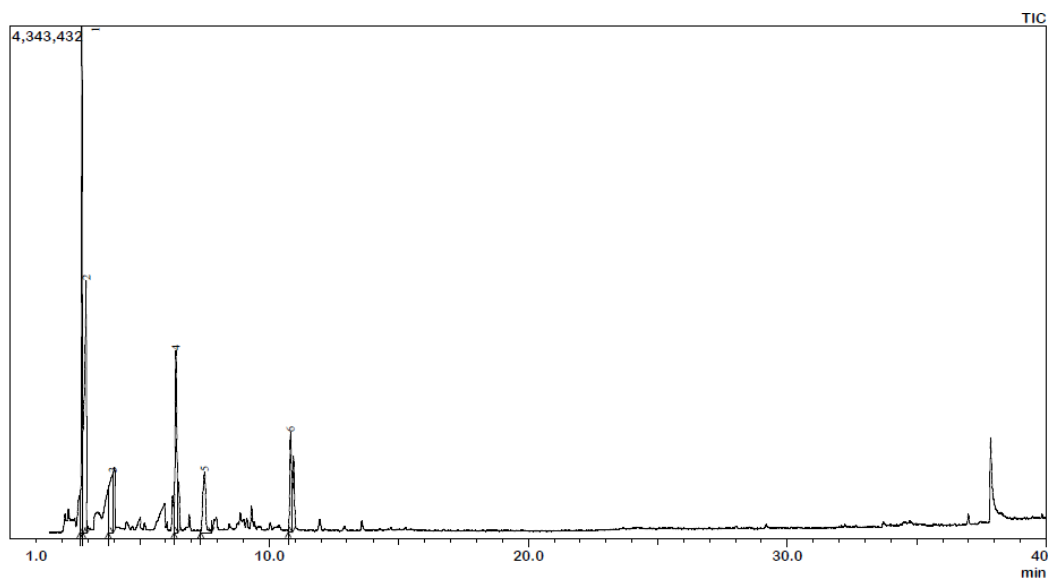

Figure 23 Chromatogram of double step hydrocracking liquid product with Ni/SBA-15w

Table 8 Compositions of double step hydrocracking liquid product with Ni/SBA-15w

| Peak # | R.time | Area     | Area (%) | Name                                         | Molecular Formula                            |
|--------|--------|----------|----------|----------------------------------------------|----------------------------------------------|
| 1      | 2.765  | 9530787  | 22.88    | Hexane                                       | C <sub>6</sub> H <sub>14</sub>               |
| 2      | 2.929  | 11561914 | 27.76    | Acetic acid                                  | C <sub>2</sub> H <sub>4</sub> O <sub>2</sub> |
| 3      | 3.953  | 5057059  | 12.14    | 1-methyl-4-(pent-1-en-4-on-2-yl) cyclohexene | C <sub>12</sub> H <sub>18</sub> O            |
| 4      | 6.393  | 7483106  | 17.97    | 2-Furancarboxaldehyde                        | C <sub>5</sub> H <sub>4</sub> O <sub>2</sub> |
| 5      | 7.501  | 3959156  | 9.51     | Acetol acetate                               | C <sub>5</sub> H <sub>8</sub> O <sub>3</sub> |
| 6      | 10.822 | 4058390  | 9.74     | 3,3-Dimethyl-2-butanone                      | C <sub>6</sub> H <sub>12</sub> O             |

ESI 5 Catalysts characterization using TEM

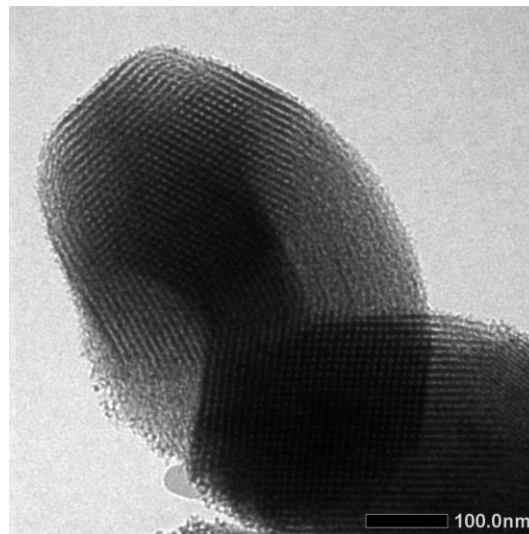

Figure 24 TEM image of SBA-15

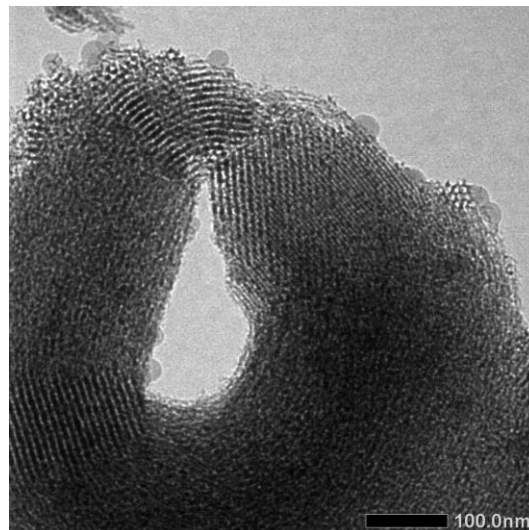

Figure 25 TEM image of NiO/SBA-15c

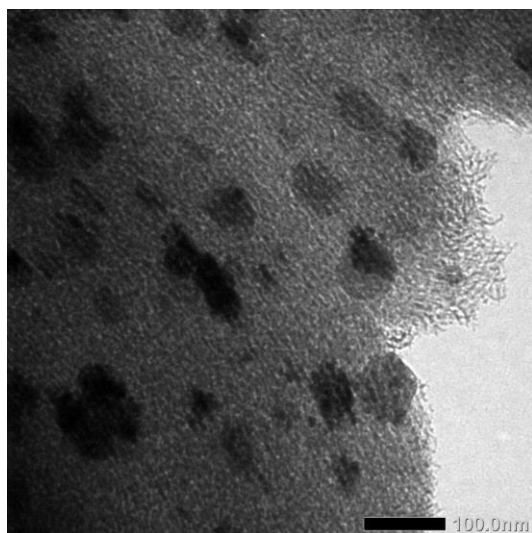

*Figure 26 TEM image of NiO/SBA-15w*

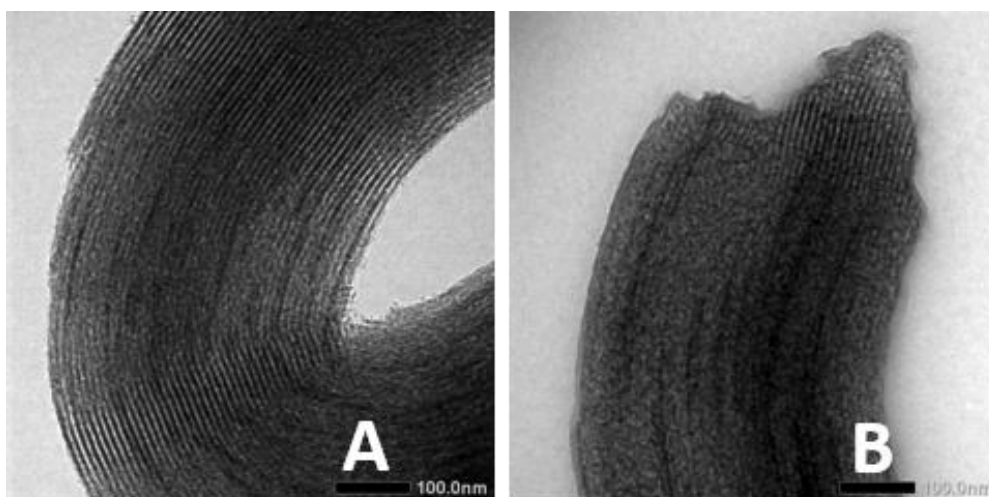

*Figure 27 TEM image of Ni/SBA-15c (A) before and (B) after hydrocracking of pyrolyzed  $\alpha$ -cellulose*

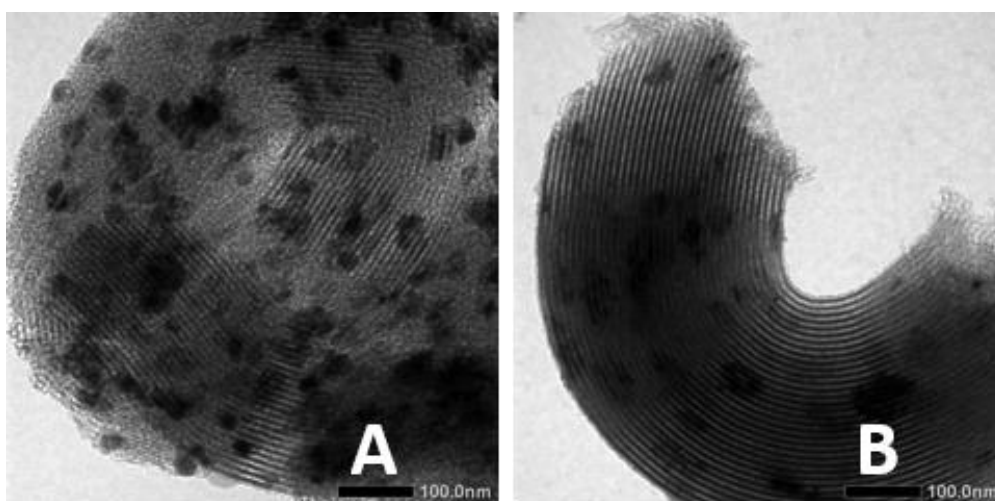

*Figure 28 TEM image of Ni/SBA-15w (A) before and (B) after hydrocracking of pyrolyzed  $\alpha$ -cellulose*
